# Supplementary material for: Use of a green and cheap ionic liquid to purify gasoline octane boosters
Source: Royal Society of Chemistry journal article supplement (doi:10.1039/b611139d), 2007-01-01
Supplement: b611139d.pdf [file b611139d.pdf]

## Electronic Supplementary Information (ESI)

**Table S.1** Boiling temperatures ( $T$ ) and liquid mole fractions ( $x_1$ ) for the system ethanol (1) + [emim][EtSO<sub>4</sub>] (2).

| T/K    | $x_1$  |
|--------|--------|
| 438.21 | 0.1600 |
| 421.19 | 0.2117 |
| 411.40 | 0.2478 |
| 398.57 | 0.3195 |
| 389.21 | 0.4004 |
| 384.53 | 0.4379 |
| 380.37 | 0.4872 |
| 376.60 | 0.5241 |
| 373.38 | 0.5666 |
| 370.69 | 0.5999 |
| 367.42 | 0.6483 |
| 364.78 | 0.6889 |
| 362.50 | 0.7273 |
| 360.41 | 0.7639 |
| 358.23 | 0.8098 |
| 356.67 | 0.8410 |
| 355.31 | 0.8749 |
| 354.53 | 0.8939 |
| 352.95 | 0.9431 |
| 352.12 | 0.9746 |
| 351.44 | 1.0000 |

**Table S.2** Antoine coefficients  $A$ ,  $B$ , and  $C$  for pure compounds.

| Compound                   | $A$     | $B$      | $C$     |
|----------------------------|---------|----------|---------|
| ETBE                       | 6.83000 | 1682.812 | 3.242   |
| Ethanol                    | 7.23710 | 1592.864 | -46.966 |
| [emim][EtSO <sub>4</sub> ] | 0       | 100      | 0       |

**Table S.3** Density ( $\rho$ ), dynamic viscosity ( $\eta$ ) and refractive index ( $n_D$ ) of the pure components of the ternary system studied in this work, at 298.15 K and atmospheric pressure.

| Component                  | $\rho / \text{g}\cdot\text{cm}^{-3}$ |                                            | $\eta / \text{mPa}\cdot\text{s}$ |                     | $n_D$   |                      |
|----------------------------|--------------------------------------|--------------------------------------------|----------------------------------|---------------------|---------|----------------------|
|                            | Exp.                                 | Lit.                                       | Exp.                             | Lit.                | Exp.    | Lit.                 |
| ETBE                       | 0.73551                              | 0.7350 <sup>1</sup>                        | 0.371                            | Not found           | 1.37298 | 1.3730 <sup>2</sup>  |
| Ethanol                    | 0.78522                              | 0.78493 <sup>3</sup>                       | 1.077                            | 1.0826 <sup>3</sup> | 1.35923 | 1.35941 <sup>3</sup> |
| [emim][EtSO <sub>4</sub> ] | 1.23882                              | 1.2296 <sup>4</sup><br>1.2423 <sup>5</sup> | 100.4                            | 100.7 <sup>6</sup>  | 1.47889 | Not found            |

<sup>1</sup> J. H. Oh and S. J. Park, *J. Chem. Eng. Data*, 1998, **43**, 1009.

<sup>2</sup> R. Reich, M. Cartes, J. Wisniak and H. Segura, *Fluid Phase Equilib.*, 1999, **154**, 99.

<sup>3</sup> J. A. Riddick, W. B. Bunger and T. Sakano, *Organic Solvents. Physical Properties and Methods of Purification*, John Wiley, New York, 4th edn., 1986.

<sup>4</sup> J. Z. Yang, X. M. Lu, J. S. Gui and W. G. Xu, *Green Chem.*, 2004, **6**, 541.

<sup>5</sup> M. Krummen, P. Wasserscheid and J. Gmehling, *J. Chem. Eng. Data*, 2002, **47**, 1411.

<sup>6</sup> J. Jacquemin, P. Husson, A. A. H. Padua and V. Majer, *Green Chem.*, 2006, **8**, 172.

## Equipment for the measurement of the physical properties:

**Density.** Densities were measured, with a precision of  $1 \times 10^{-5} \text{ g}\cdot\text{cm}^{-3}$ , in a vibrating U-tube Anton Paar DMA 60 density meter with a DMA 602 measuring cell attached. Temperature was controlled by means of a Heto Therm ultrathermostat, and measured with a precision of  $\pm 0.001 \text{ K}$  using a CTK100 Anton Paar precision thermometer.

**Viscosity.** Measurements of viscosity were carried out in an Ubbelohde viscometer. Measurements of the liquid flow times through it were performed by a Lauda Processor Viscosity System PVS1 with a resolution of 0.01 s. Temperature was kept constant using a Lauda clear-view thermostat D 20 KP with a through-flow cooler DLK 10 attacher, with a thermal stability of  $\pm 0.005 \text{ K}$ .

**Refractive index.** An ATAGO RX-5000 refractometer was used to determine the refractive indices of the substances with a precision of  $4 \times 10^{-5}$ . Control of the temperature was carried out with a Techne thermostat ( $\pm 0.01 \text{ K}$ ).
